# Supplementary material
Source: PubMed Central journal article supplement (PMC5607633)
Supplement: NIHMS873046-supplement-Supplementary_Information.pdf [file NIHMS873046-supplement-Supplementary_Information.pdf]

## Supplementary Information

### Young inversion with multiple linked QTLs under selection in a hybrid zone

Cheng-Ruei Lee<sup>1,2</sup>, Baosheng Wang<sup>1,3</sup>, Julius Mojica<sup>1</sup>, Terezie Mandáková<sup>4</sup>, Kasavajhala V. S. K. Prasad<sup>5</sup>, Jose Luis Goicoechea<sup>6</sup>, Nadeesha Perera<sup>1</sup>, Uffe Hellsten<sup>7</sup>, Hope N. Hundley<sup>7</sup>, Jenifer Johnson<sup>7</sup>, Jane Grimwood<sup>8</sup>, Kerrie Barry<sup>7</sup>, Stephen Fairclough<sup>7</sup>, Jerry W. Jenkins<sup>7</sup>, Yeisoo Yu<sup>9</sup>, Dave Kudrna<sup>6</sup>, Jianwei Zhang<sup>6</sup>, Jayson Talag<sup>6</sup>, Wolfgang Golser<sup>6</sup>, Katherine Ghattas<sup>1</sup>, M. Eric Schranz<sup>10</sup>, Rod Wing<sup>6</sup>, Martin A. Lysak<sup>4</sup>, Jeremy Schmutz<sup>7</sup>, Daniel S. Rokhsar<sup>7</sup>, Thomas Mitchell-Olds<sup>1</sup>

<sup>1</sup>Department of Biology, Box 90338, Duke University, Durham, NC, 27708, USA

<sup>2</sup>Institute of Ecology and Evolutionary Biology & Institute of Plant Biology, National Taiwan University, Taipei 10617, Taiwan ROC

<sup>3</sup>Department of Plant Ecology and Genetics, Uppsala University, Norbyvägen 18D, SE-752 36 Uppsala, Sweden

<sup>4</sup>Plant Cytogenomics Group, CEITEC – Central European Institute of Technology, Masaryk University, Kamenice 5, Brno CZ-62500, Czech Republic

<sup>5</sup>Department of Biology, Colorado State University, Fort Collins, Colorado 80523, USA

<sup>6</sup>Arizona Genomics Institute and BIO5 Institute, School of Plant Sciences, University of Arizona, Tucson, AZ, 85721, USA

<sup>7</sup>Department of Energy Joint Genome Institute, Walnut Creek, California, 94598, USA

<sup>8</sup>HudsonAlpha Institute for Biotechnology, Huntsville, Alabama, USA

<sup>9</sup>Phyzen Genomics Institute, Phyzen Inc., Seoul, 151-836, South Korea

<sup>10</sup>Biosystematics Group, Wageningen University & Research Center, Droevendaalsesteeg 1, 6708PB, Wageningen, The Netherlands

#### **This PDF file includes:**

Figs. S1 - S9

Tables S1 - S8

#### **Other Supplementary Materials for this manuscript:**

All data files is available from <http://www.datadryad.org>. These include:

Script for power simulation: Script\_01-Power simulation.R.txt

Script for ancestral alleles: Script\_get\_anc\_for\_variable\_sites.py.txt

Script for MANOVA permutation: Script\_MANOVA\_permutation.R.txt

Script for VCF reformatting: Script\_Transf\_vcf2fas.py.txt

Script for GATK analysis: Script\_Variant\_discovery.txt

Boechera library information: Sup Data Boechera Libraries.xlsx

Experimental crosses: Sup Data Experimental Crosses.docx

Gene expression data: Sup Data Expression.xlsx

Genotypes used: Sup Data Genotype\_Information.xlsx  
RIL genotype matrix: Sup Data Genotype\_Matrix\_For\_RILs.xlsx  
Hybrid zone genotype matrix: Sup Data INV122\_RP83.snp.geno.xlsx  
Annotation of SNPs within the inversion: Sup Data Inversion\_SNP\_annotation.xlsx  
JGI library information: Sup Data JGI\_Libraries.xlsx  
Breakpoints and primers: Sup Data Locations of breakpoints and related primers.docx  
Crossover locations: Sup Data LTMxSAD12\_Inferred\_Crossovers.xlsx  
NIL flowering times: Sup Data LTMxSAD12\_NIL\_Flowering\_time.xlsx  
Recombinant inbred genotypes: Sup Data LTMxSAD12\_RIL\_IDS.xlsx  
F2 phenotypes: Sup Data LTMxSDM\_Trait\_Matrix.xlsx  
Linkage map for RILs: Sup Data Map\_For\_LTMxSAD\_RILs.xlsx  
Collinear Cross traits\_1:  
    Sup Data ParkerxRuby-KAS6\_GH\_flowering\_20120804-Indiv-Data\_3-Blks.xls  
Collinear Cross traits\_2:  
    Sup Data ParkerxRuby-KAS6\_GH\_flowering\_20120804-Indiv-Data\_9-Blks.xlsx  
Collinear cross family means:  
    Sup Data ParkerxRuby-KAS6\_GH\_Trait\_Matrix-Family\_Means.xlsx  
Linkage map data for collinear cross: Sup Data PARxRUBY\_Linkage\_Map.xlsx  
Primers used for gene expression: Sup Data Primers for gene expression.docx  
Whole genome profiling: Sup Data Whole Genome Profiling.xlsx

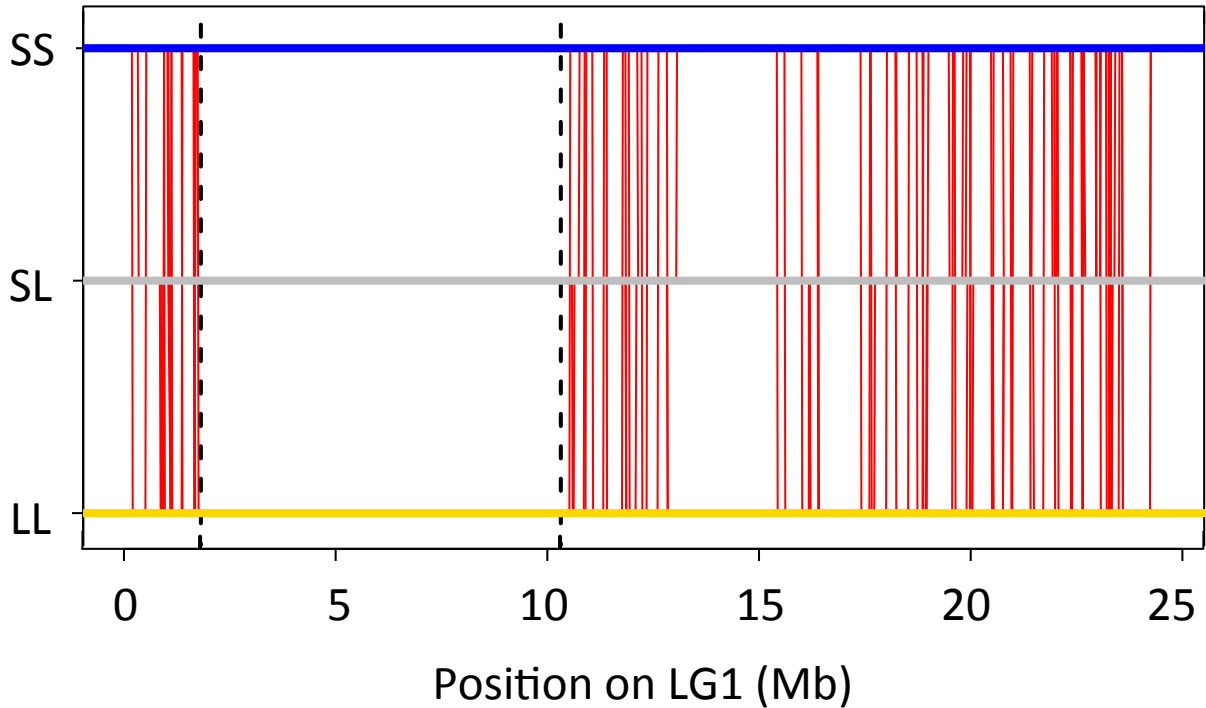

**Supplementary Figure 1: Recombination on LG1.** No recombination events occurred within the inversion in a recombinant inbred population of 159 F6 individuals. Locations of crossovers are shown along LG1, for F6 individuals from the LTM x SAD12 (*WEST-inv* x *EAST-std*) cross. Horizontal axis shows nucleotide position, and vertical axis shows SAD12 homozygous regions (SS, blue line), heterozygous regions (SL, gray line), and homozygous LTM regions (LL, yellow line). Crossovers are shown by vertical red lines, from one homozygote to another (full length red line) or between homozygous and heterozygous regions (half-height red lines). The inversion region is delimited by vertical dashed lines. These data are compatible with the hypothesis that a pre-existing haplotype was captured by the new inversion, or that an extremely rare double-recombinant was captured by the young inversion before its selective sweep.

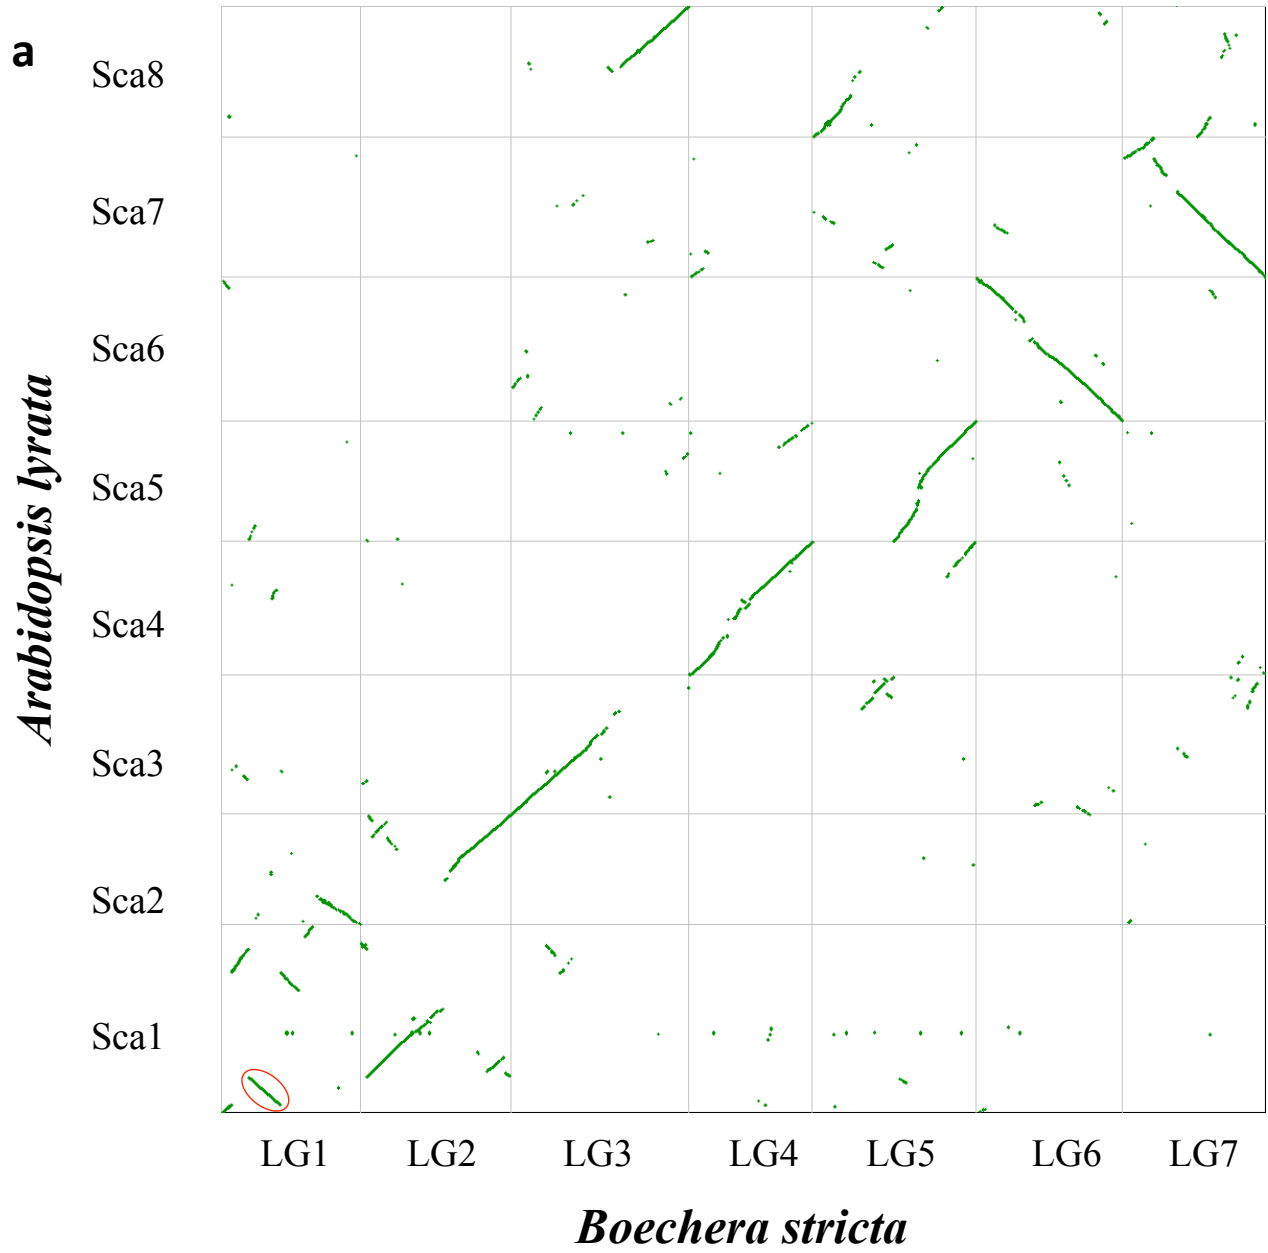

**b**

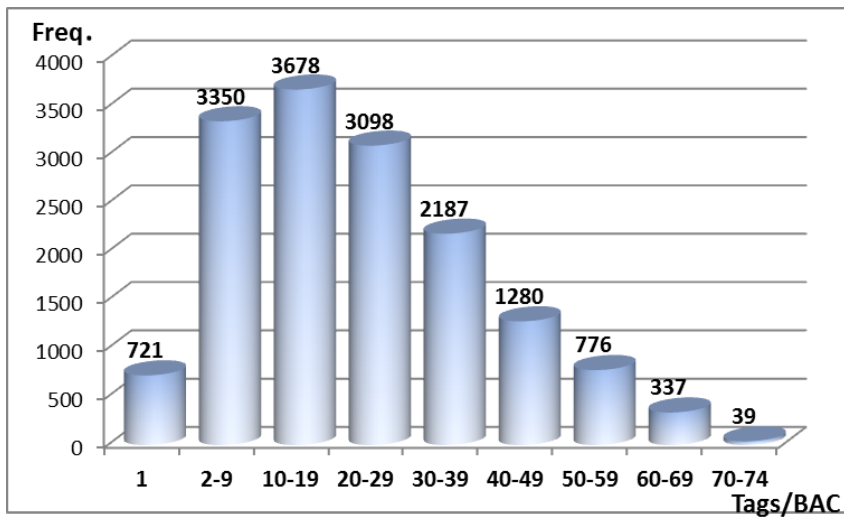

**c**

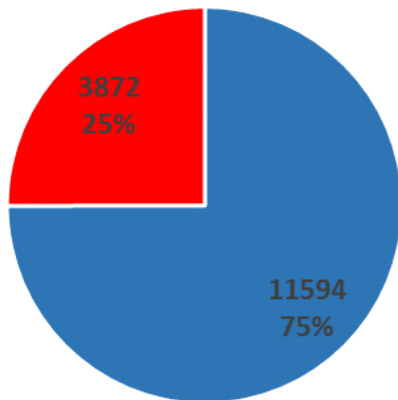

■ In Contigs ■ Singletons

**d**

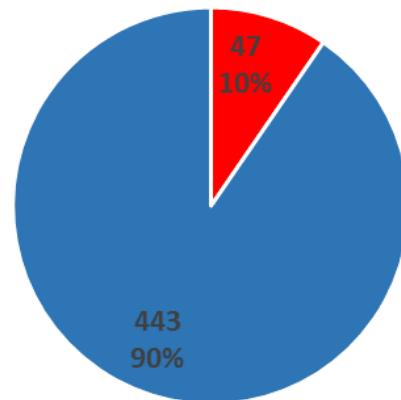

■ Not anchored ■ Anchored

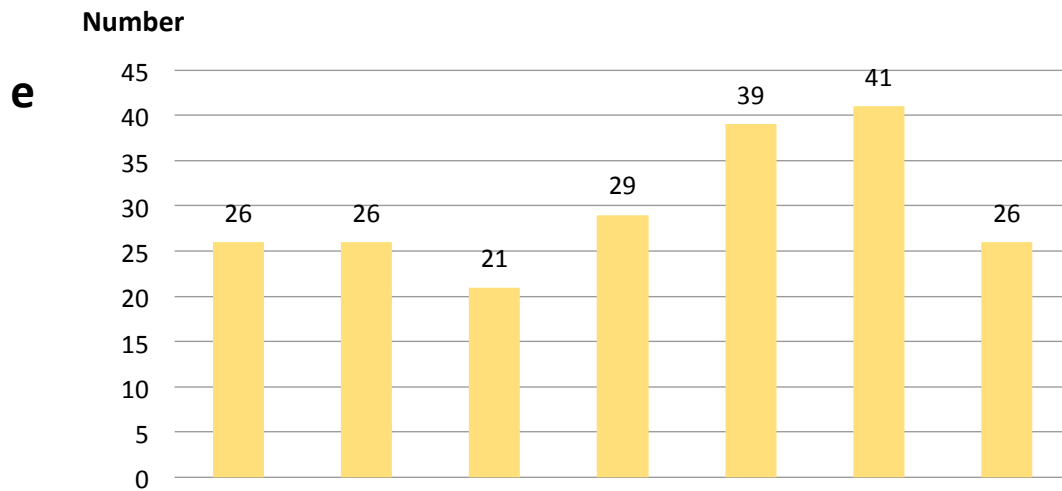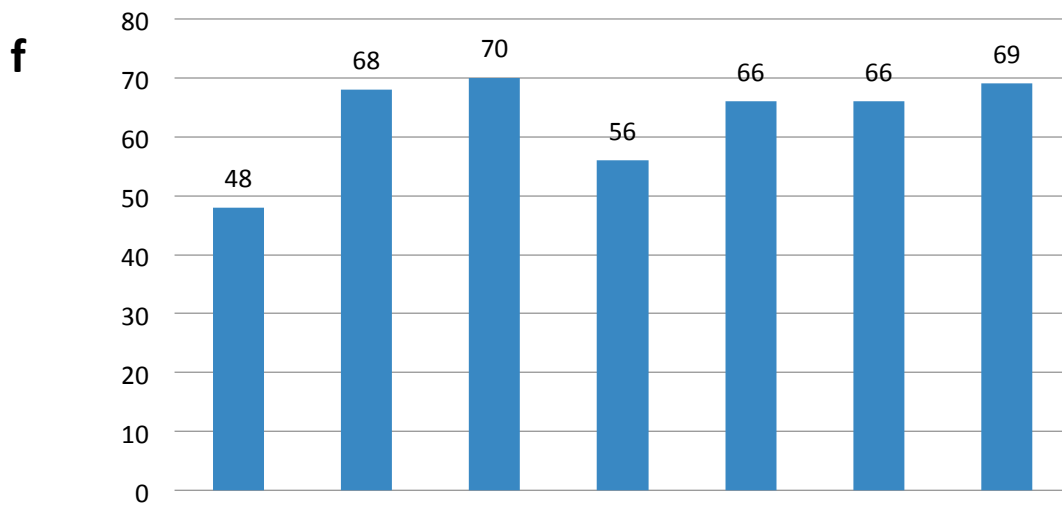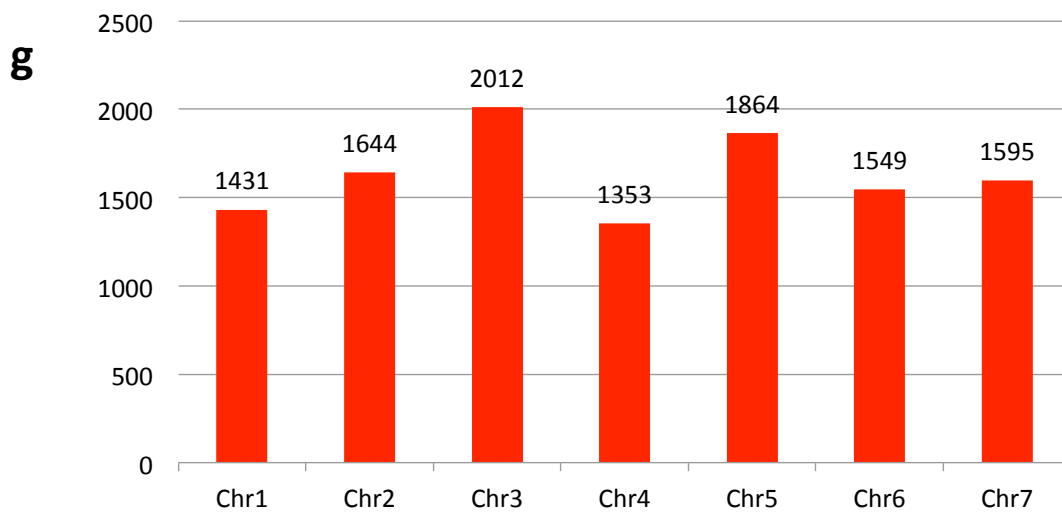

**Supplemental Figure 2: Results from genome sequencing.** (a) Genome-scale synteny between *B. stricta* (n=7) and *A. lyrata* (n=8). The longest eight scaffolds are shown for *A. lyrata*. A complete overview of the most parsimonious model of chromosome evolution of *B. stricta* has been presented elsewhere<sup>53</sup>. The region within the circle represents the paracentric inversion found in the reference genotype for genomic blocks A1b and C1a (Fig. 1). (b) Number of Whole Genome Profiling tags / BAC. (c) Distribution of clones in contigs. (d) Distribution of anchored contigs. (e) Number of scaffolds / chromosome. (f) Number of contigs / chromosome. (g) Number of clones anchored to chromosomes.

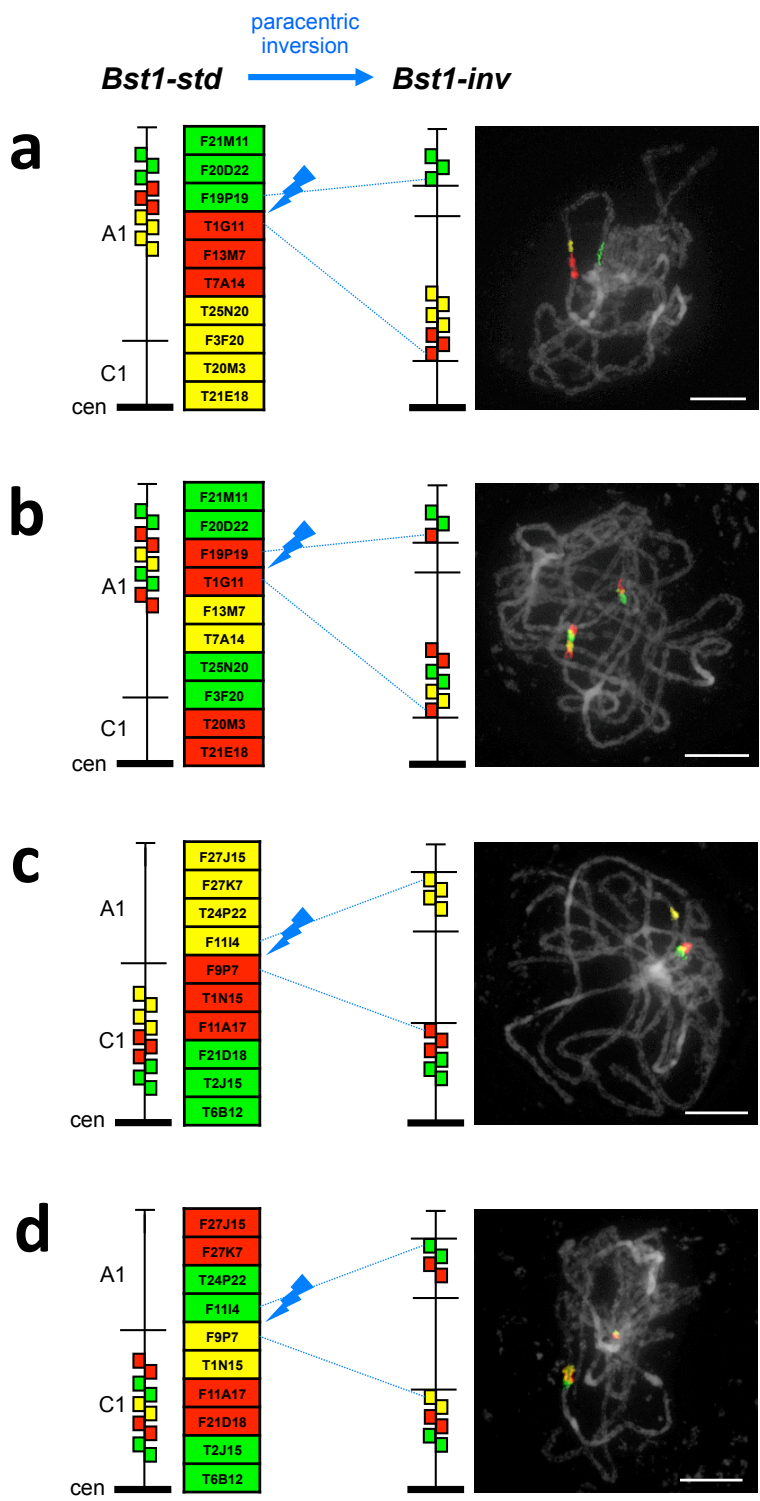

**Supplementary Figure 3:**  
**Close-up of *Bst1-inv***  
**breakpoints using**  
**comparative chromosome**  
**painting on pachytene**  
**chromosomes.** Shown are  
 diagrams and painting  
 images around the *Bst1*  
 breakpoints: **(a and b)** show  
 the A1 breakpoint between  
 BACs F19P19 and T1G11;  
**(c and d)** show the C1  
 break-point at F9P7/F11I4.



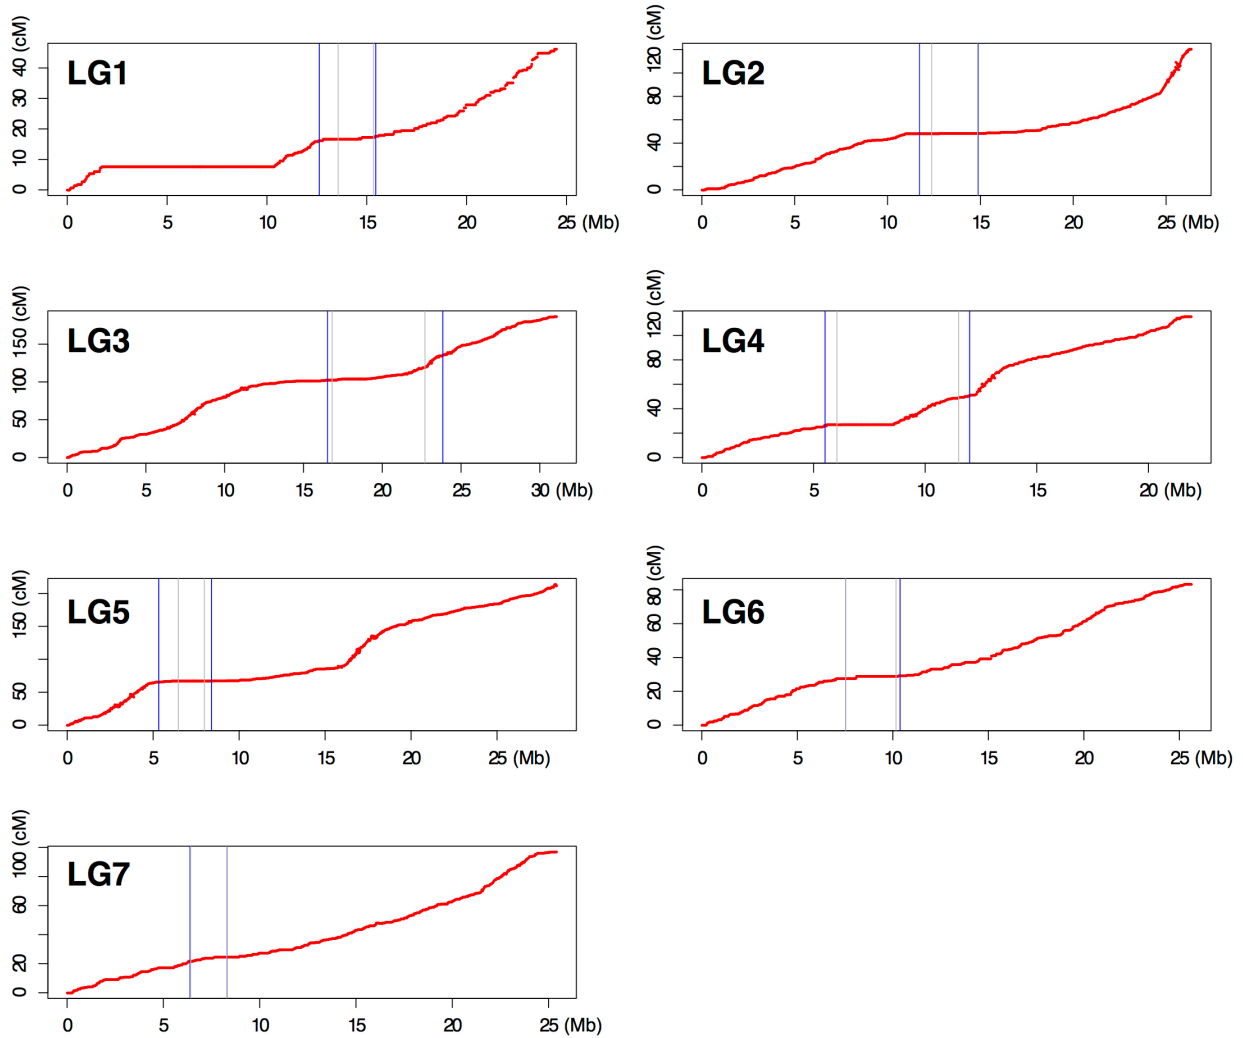

**Supplementary Fig. 4: Predicted centromere locations for each linkage group.** Shown are plots of physical and linkage map position on seven linkage groups (red lines). Blue vertical lines indicate the inferred margins of centromeres based on homology to *A. thaliana* centromeric BAC clones. Gray vertical lines indicate the margins of *B. stricta* scaffolds that contain these BAC-homologues.

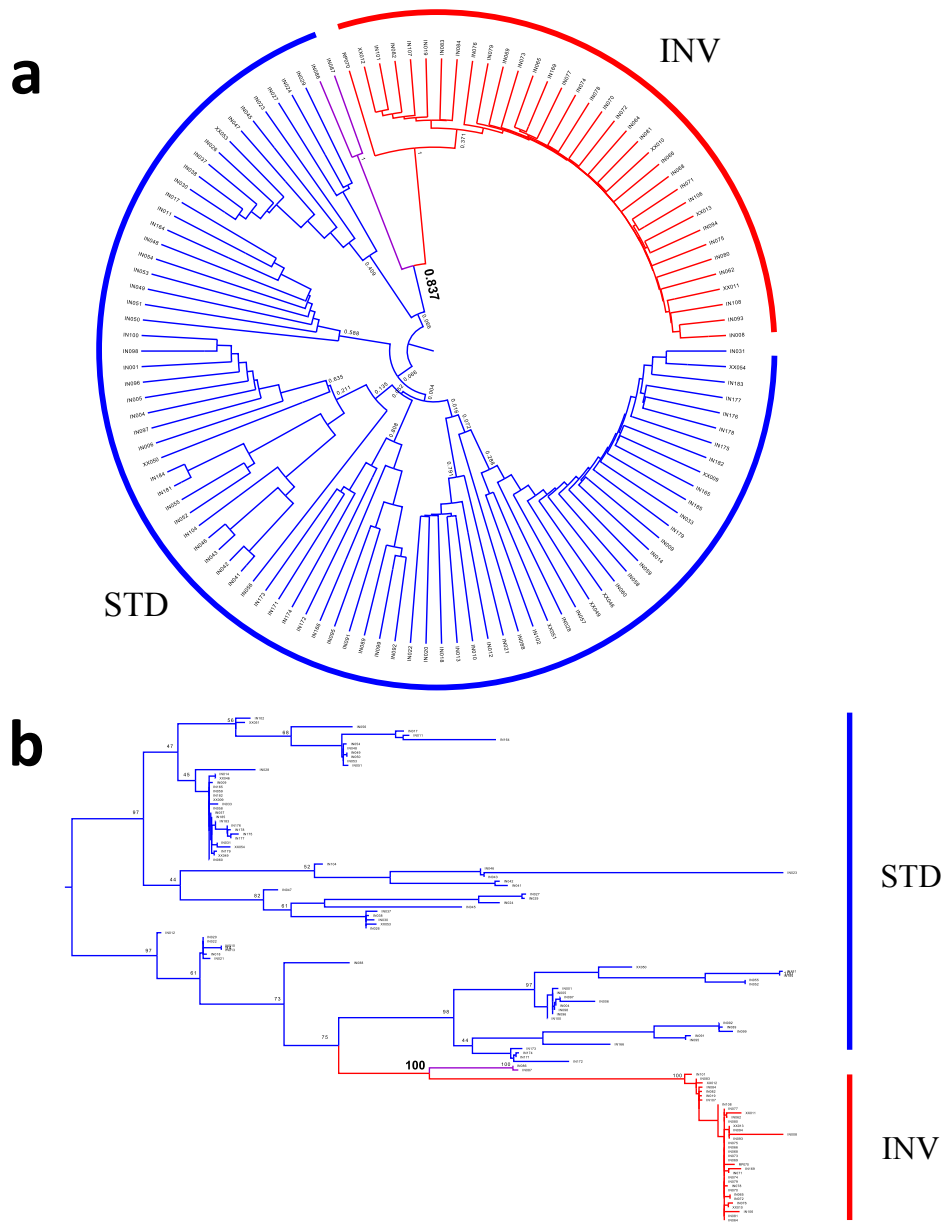

**Supplementary Figure 5: Inversion haplotypes form a recent, monophyletic clade.** Shown are (a) Neighbor-Joining (NJ) and (b) Maximum likelihood (ML) trees based on 901 SNPs in the inversion region for 118 *Bsil-inv* and *Bsil-std* haplotypes. All *Bsil-inv* haplotypes form a strongly supported clade (100% bootstrap support on NJ and ML trees) that is sister to a clade formed by two *Bsil-std* genotypes (IN086 and IN087, purple) from Saddle Mountain. This pair of genotypes cluster together with 84% and 100% bootstrap support on NJ and ML trees, respectively. In turn, these two haplotypes are nested within other *Bsil-std* genotypes. These results indicate a single origin of *Bsil-inv* haplotypes from ancestral *Bsil-std* haplotypes. The most closely related *Bsil-inv* and *Bsil-std* genotypes are only 1.7 km away from each other and have very low levels of nucleotide divergence (0.21 SNPs per kb of Genotype By Sequencing reads). The maximum and mean distances between INV haplotypes are  $1.230 \times 10^{-4}$  and  $2.904 \times 10^{-5}$ , respectively, allowing a rough calibration for the age of inversion at 2,074 – 8,785 years.

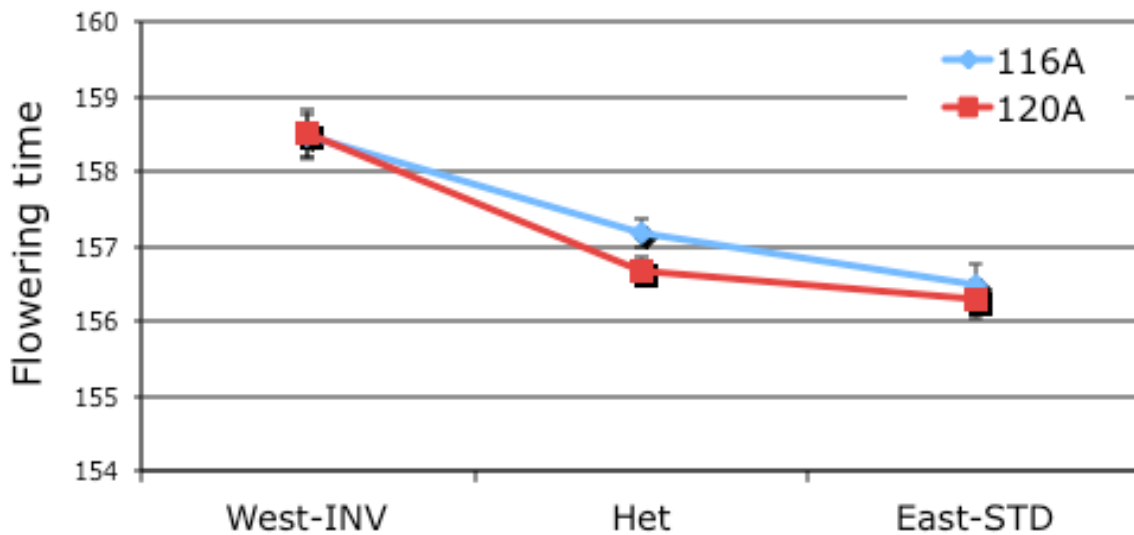

**Supplementary Figure 6: Flowering time in two near-isogenic segregating families.** Shown is flowering time of two F7 WEST-inv x EAST-std heterogeneous inbred families (HIFs, or segregating near-isogenic lines). Two independent HIFs (116A, blue) and (120A, red) show phenotypic effects of the inversion region segregating within each family, while the rest of the genome is nearly isogenic in each family. Genotypes in families are either homozygous WEST-inv, heterozygous, or homozygous EAST-std. Flowering time is indicated in days; error bars are +/- 1 standard error of the mean.

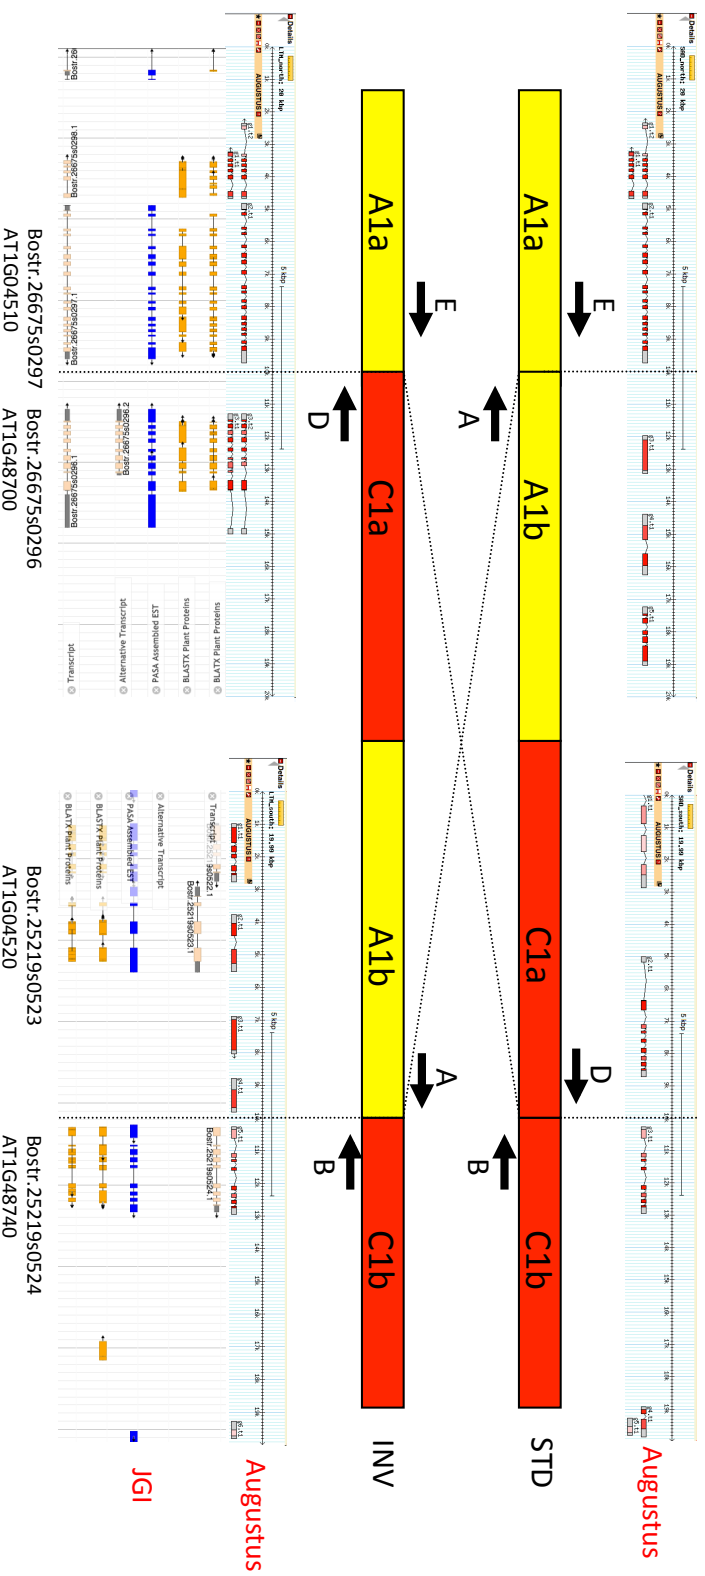

**Supplementary Figure 7: Gene models near inversion breakpoints.** Gene models syntenic to Arabidopsis are indicated near the inversion breakpoints, based on Augustus analysis of the hard-masked 20kb regions centered on each breakpoint in the reference genome (inversion) and the inferred standard haplotype. Primers used to distinguish inversion vs. standard haplotypes are indicated by lettered arrows. No open reading frames spanning the breakpoints in either the inversion or standard haplotypes were found, hence the chromosomal inversion does not disrupt existing or create new open reading frames. Shown are gene models from Augustus and/or JGI analysis, which largely correspond to the transcriptome-assisted annotation in *B. Stricta* genome v1.2. Different colors here indicate gene models from different annotation methods. Six complete genes are shown: BostR.26675s0298, BostR.26675s0297, BostR.26675s0296, BostR.25219s0522, BostR.25219s0523, BostR.25219s0524. The four genes flanking both breakpoints are labeled.

**a**

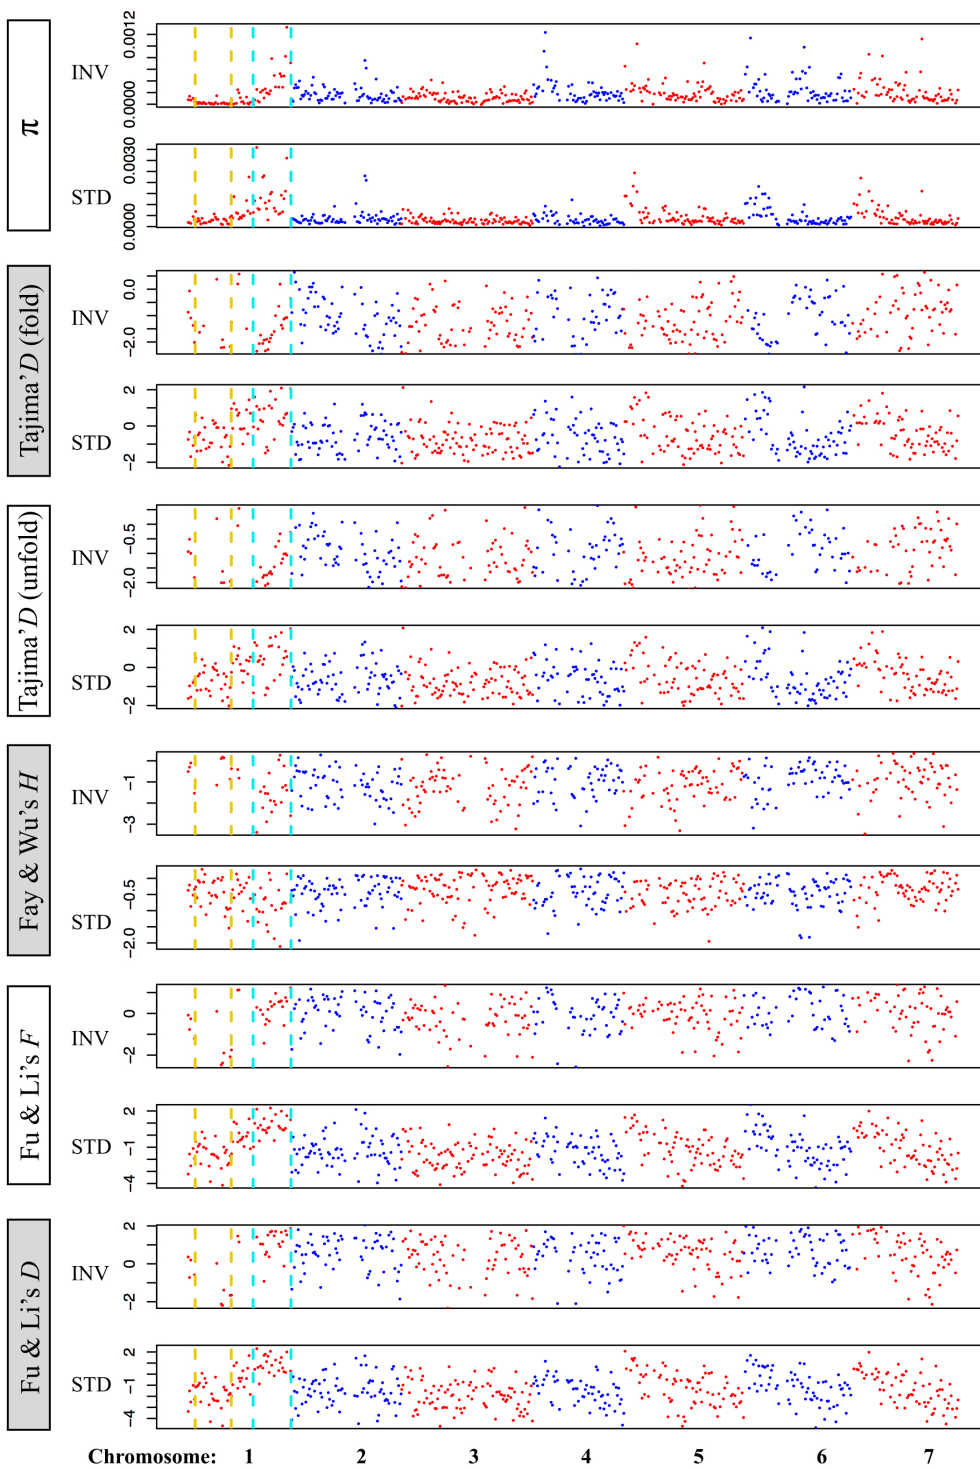

**a**

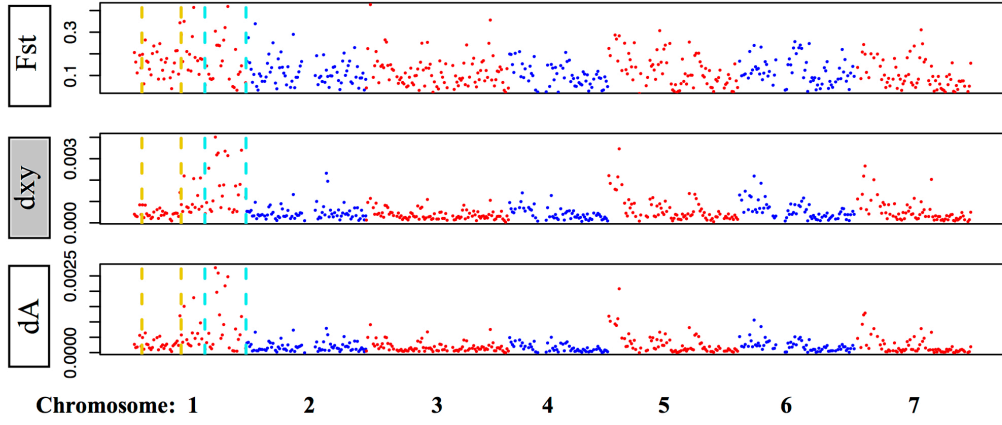

**b**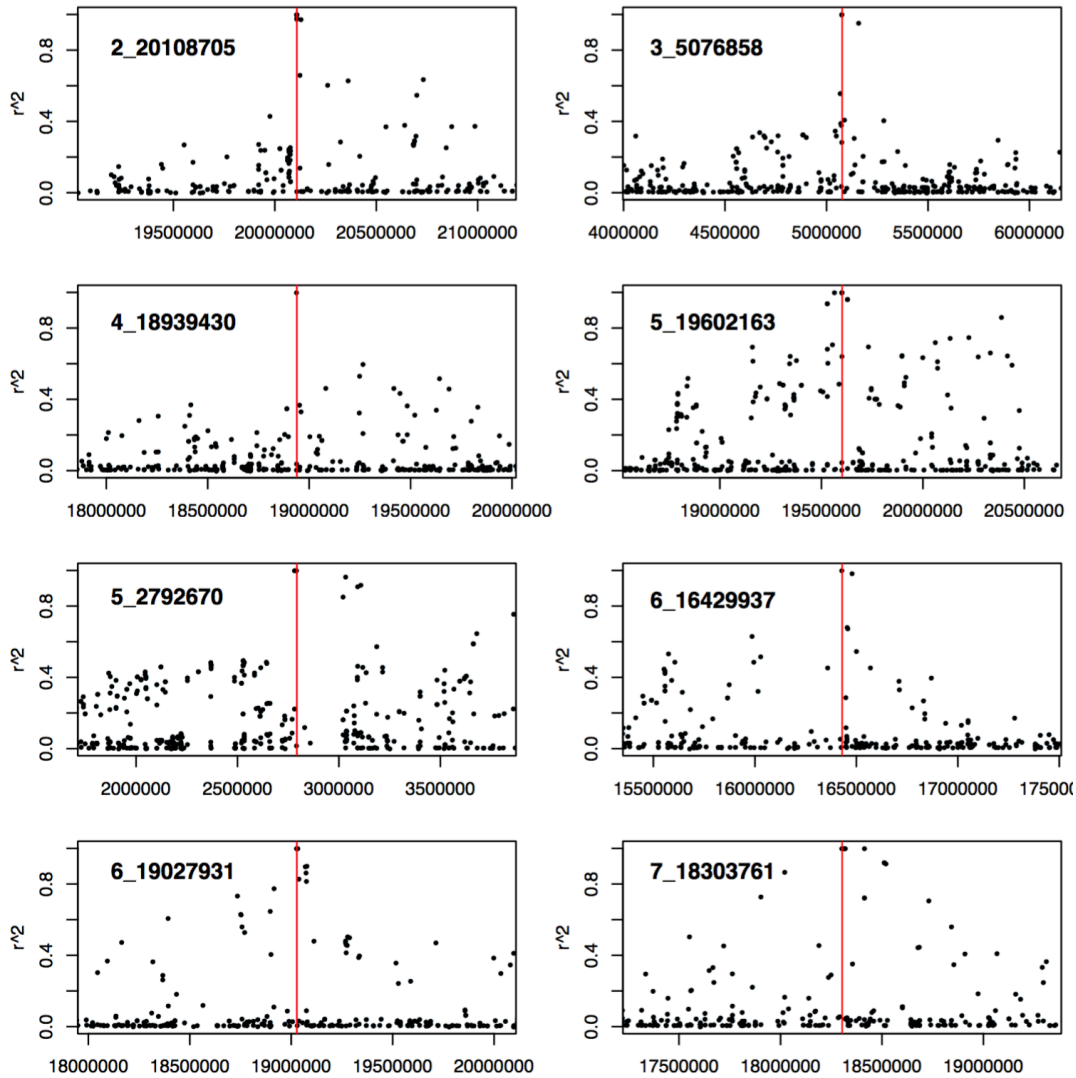

**Supplementary Figure 8: Population genomics analyses.** (a) Manhattan plots of population genomic parameters estimated in 300 kb non-overlapping windows. Unfolded (or folded) analyses use (or do not use) information on the ancestral allele. Nucleotide diversity ( $\pi$ ), Tajima's  $D$ , Fay & Wu's  $H$ , Fu & Li's  $F$  and Fu & Li's  $D$  were calculated for each of the INV and STD groups. Population genetic differentiation ( $F_{st}$ ), pairwise nucleotide divergence ( $D_{xy}$ ), and net pairwise divergence ( $dA$ ) were estimated between INV and STD groups. Alternating colors paint the different chromosomes, and the dashed vertical lines mark the inversion region (golden) and block D region (light blue) on LG1. (b) Linkage disequilibrium ( $r^2$ ) between ten randomly chosen target SNPs having derived allele frequencies similar to *Bsil-inv*, and their surrounding SNPs within 2 Mb (+/- 1Mb) windows centered on the target SNP, on chromosomes 2-7. Positions of target SNPs are indicated by vertical red lines.

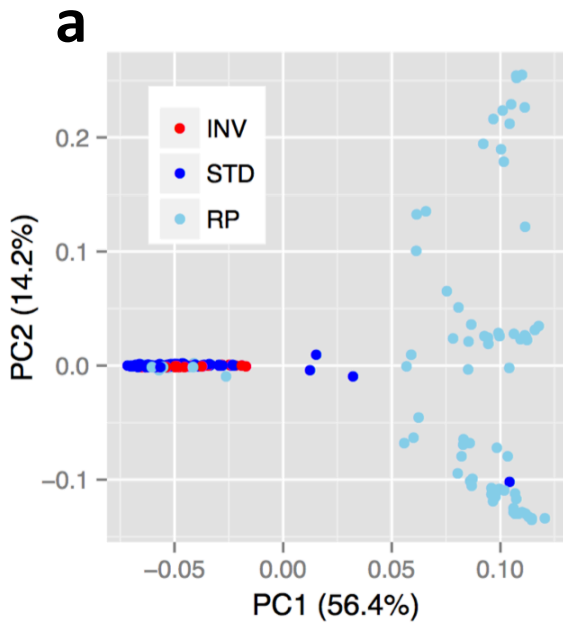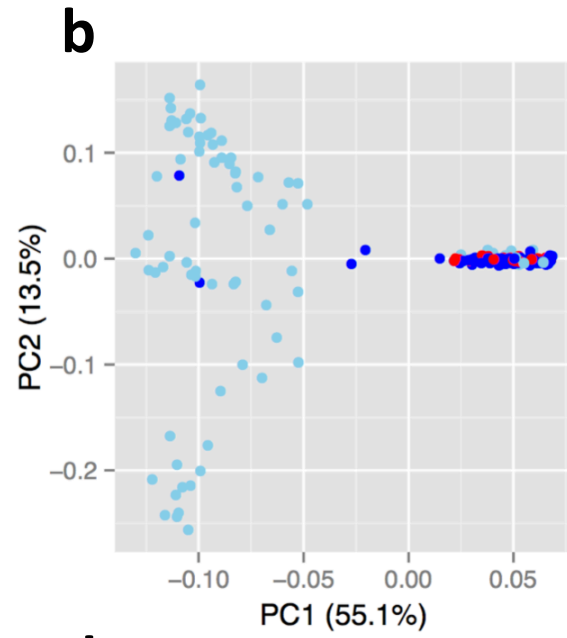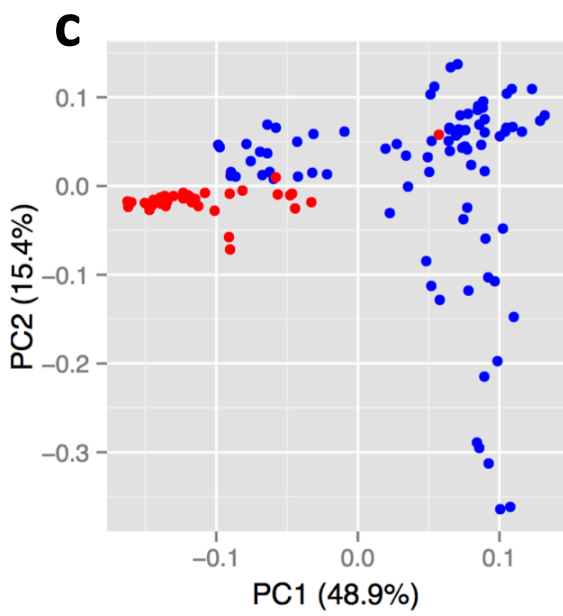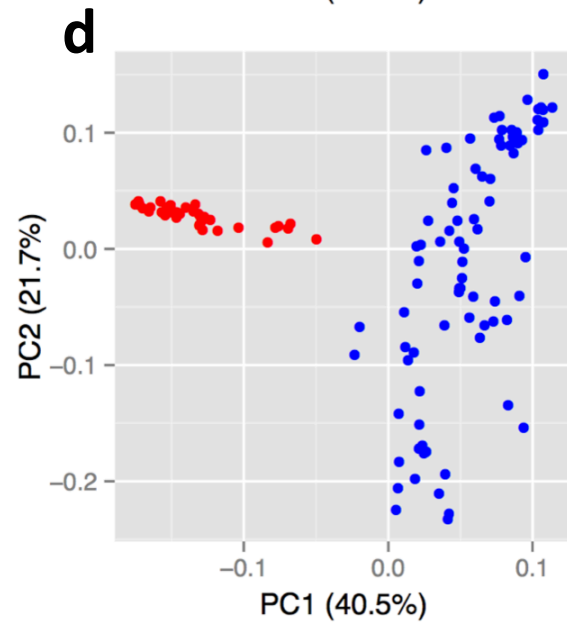



**Supplementary Figure 9: Principal Components of species-wide and inversion zone genotypes.** Genetic principal component analysis (PCA) of *Boechera stricta* based on genotyping by sequencing SNPs. **(a)** and **(b)** show PCA of 205 accessions based on genome-wide SNPs and the LG1 inverted region, respectively. These results support two diverged subspecies in *B. stricta* (EAST and WEST). All genotypes from the inversion zone were identified as members of the WEST group, except that four *Bsil-std* genotypes had high levels of admixture from the EAST group (0.44 – 0.92 on PC1), indicating introgression from the EASTERN subspecies in the inversion zone. INV (red): inversion genotypes from inversion zone; STD (dark blue): standard genotypes from the inversion zone; Reference Population (RP, light blue): species-wide samples from outside the inversion zone. **(c)** and **(d)** show PCA of 118 accessions near the inversion zone based on genome-wide SNPs, or the inverted genome region, respectively. For comparison of inversion haplotypes to the most closely related standard haplotypes, we used all genotypes in the left portion of C. (One admixed *inv* genotype was excluded: IN019, shown in red on the right hand side).

**Supplementary Table 1. Overview of linkage maps used in these experiments.**

| <b>Parents</b>      | <b>Cross</b>  | <b>Generation</b> | <b>Map Length</b> | <b>Number of Bins</b> | <b>Method</b>            |
|---------------------|---------------|-------------------|-------------------|-----------------------|--------------------------|
| EAST-std x WEST-std | Parker x Ruby | F4                | 1130 cM           | 1,011                 | Genotyping by sequencing |
| EAST-std x WEST-inv | SAD12 x LTM   | F6                | 860 cM            | 9,273                 | Light sequencing         |

Detailed linkage maps are archived at Dryad.

**Supplementary Table 2a.** Test of segregation distortion in two NIL families between LTM and SAD12.  $N = 144$ .

| Family | INV allele | STD allele | Chi-sq (df=1) | P      |
|--------|------------|------------|---------------|--------|
| 116A   | 142        | 146        | 0.0560        | 0.8140 |
| 120A   | 130        | 158        | 2.7220        | 0.0990 |

**Supplementary Table 2b.** Test of Hardy-Weinberg equilibrium (expected genotype frequency calculated from empirical allele frequency) in two NIL families between LTM and SAD12.  $N = 144$ .

| Family | INV homozygotes | Heterozygotes | STD homozygotes | Chi-sq (df=1) | P      |
|--------|-----------------|---------------|-----------------|---------------|--------|
| 116A   | 33              | 76            | 35              | 0.4480        | 0.5033 |
| 120A   | 27              | 76            | 41              | 0.6200        | 0.4781 |

**Supplementary Table 2c.** Analysis of variance for flowering time in the greenhouse for two NIL families between LTM and SAD12.  $N = 288$ ,  $R^2 = 14.7\%$ .

| Effect                     | DF | SS       | F       | P        |
|----------------------------|----|----------|---------|----------|
| Family                     | 1  | 3.0694   | 0.8851  | 0.3476   |
| Inversion Genotype         | 2  | 151.2487 | 21.8064 | 1.60E-09 |
| Inversion Genotype* Family | 2  | 3.1379   | 0.4524  | 0.6366   |

**Supplementary Table 2d.** Comparison of flowering times between EAST and WEST subspecies. T-test for flowering time in the greenhouse, comparing 12 EAST and 12 WEST genotypes.  $R^2 = 24.7\%$ . Subspecies means equal 10.07 and 15.06 days for EAST and WEST subspecies, respectively. (Data taken from genotype LSMEANS, Table S1 in ref. 19).

| Effect     | DF | t-statistic | P      |
|------------|----|-------------|--------|
| Subspecies | 22 | 2.69        | 0.0134 |

**Supplementary Table 3a:** Test of segregation distortion in a sympatric, reciprocal WEST-*inv* x WEST-*std* F2 cross.  $N = 1,988$  alleles = 994 individuals.

| <b>Cross</b> | <b>INV allele</b> | <b>STD allele</b> | <b><math>\chi^2</math> (df = 1)</b> | <b><i>P</i></b> |
|--------------|-------------------|-------------------|-------------------------------------|-----------------|
| CL9.1        | 483               | 507               | 0.582                               | 0.446           |
| CL10.1       | 495               | 503               | 0.064                               | 0.800           |
| Combined     | 978               | 1010              | 0.515                               | 0.473           |

**Supplementary Table 3b:** Test of Hardy-Weinberg equilibrium (expected genotype frequency calculated from empirical allele frequency) in a sympatric, reciprocal WEST-*inv* x WEST-*std* F2 cross.  $N = 994$  individuals.

| <b>Cross</b> | <b>INV homo</b> | <b>Het</b> | <b>STD homo</b> | <b><math>\chi^2</math> (df = 1)</b> | <b><i>P</i></b> |
|--------------|-----------------|------------|-----------------|-------------------------------------|-----------------|
| CL9.1        | 117             | 249        | 129             | 0.022                               | 0.882           |
| CL10.1       | 127             | 241        | 131             | 0.577                               | 0.447           |
| Combined     | 244             | 490        | 260             | 0.190                               | 0.663           |

Note:

CL9.1 = LTM as mother

CL10.1 = Saddle Mountain (SDM) as mother

**Supplementary Table 4:** Inversion effects on life history traits in a sympatric, reciprocal WEST-*inv* x WEST-*std* F2 cross in the greenhouse <sup>a, b</sup>  $N = 1,000$ .

| Trait                                        | Inversion <i>F</i> | Cross <i>F</i> | Inversion*Cross <i>F</i> | Inversion <i>P</i> | Inversion*Cross <i>P</i> |
|----------------------------------------------|--------------------|----------------|--------------------------|--------------------|--------------------------|
| MULTIVARIATE-TRAITS MANOVA                   | 2.095              | 1.050          | 0.779                    | <b>0.005</b>       | 0.743                    |
| Survival after vernalization <sup>c</sup>    | 0.554              | 0.656          | 0.616                    | 0.594              | 0.536                    |
| Flowering or not <sup>c</sup>                | 0.276              | 6.867          | 0.160                    | 0.728              | 0.855                    |
| Rosette width at 4 week                      | 1.701              | 5.918          | 0.240                    | 0.173              | 0.778                    |
| Rosette width at 10 week                     | 0.873              | 6.405          | 0.164                    | 0.458              | 0.857                    |
| Days to flowering                            | 3.880              | 0.059          | 0.265                    | <b>0.030</b>       | 0.774                    |
| Width when flowering                         | 0.077              | 0.328          | 0.745                    | 0.926              | 0.487                    |
| Height when flowering                        | 0.543              | 0.185          | 0.119                    | 0.562              | 0.892                    |
| Rosette number when flowering                | 0.124              | 0.119          | 2.792                    | 0.902              | 0.063                    |
| Leaf number when flowering                   | 3.726              | 1.218          | 0.122                    | <b>0.035</b>       | 0.881                    |
| Fruit number of flowered plants              | 2.148              | 4.375          | 0.996                    | 0.116              | 0.367                    |
| Lifetime fitness (fruit number) <sup>d</sup> | 2.172              | 11.046         | 0.161                    | 0.104              | 0.854                    |

a. *P* values were obtained by comparing the true statistic to those from 1,000 permutations. Within each permutation the inversion genotype was randomized within each cross. MANOVA  $R^2$  attributable to the inversion  $\approx 4\%$ .

b. Inversion degrees of freedom = 2, Cross degrees of freedom = 1, and Inversion\*Cross degrees of freedom = 2

c. 'Survival after vernalization' and 'flowering or not' are binary traits

d. Fruit number of dead or non-flowering plants was set to zero

**Supplementary Table 5.** Quantitative PCR tests for differential expression between *Bsil-inv* and *Bsil-std* homozygotes for seven genes flanking inversion breakpoints and syntenic to *A. thaliana*.  $N = 11$  F2 plants homozygous for the inversion.  $N = 12$  homozygous for standard haplotypes. Significance was determined by ANOVA with 1000 permutations.

| <i>B. stricta</i> gene | <i>A. thaliana</i> ortholog | $2^{4Ct}$ <i>F</i> value ( <i>P</i> value) | $4Ct$ <i>F</i> value ( <i>P</i> value) |
|------------------------|-----------------------------|--------------------------------------------|----------------------------------------|
| Bostr.26675s0299       | AT1G04500                   | 0.72 (0.412)                               | 3.23 (0.092)                           |
| Bostr.26675s0297       | AT1G04510                   | 0.61 (0.420)                               | 1.35 (0.213)                           |
| Bostr.25219s0523       | AT1G04520                   | 0.15 (0.763)                               | 0.08 (0.791)                           |
| Bostr.25219s0522       | AT1G04530                   | 1.40 (0.279)                               | 2.48 (0.157)                           |
| Bostr.25219s0521       | AT1G04540                   | 1.83 (0.223)                               | 0.94 (0.381)                           |
| Bostr.26675s0296       | AT1G48700                   | 2.81 (0.112)                               | 1.65 (0.205)                           |
| Bostr.25219s0524       | AT1G48740                   | 0.06 (0.817)                               | 0.31 (0.606)                           |

Power analyses were performed with JMP and with simulations in R. For all seven genes, we found that both alleles are expressed, hence major expression differences do not occur for the genes near the breakpoints. Across these genes, our ability to detect a true gene expression difference corresponding to the observed levels had a median power of 19.8%, so our ability to detect individual quantitative expression differences is low. Nevertheless, we can calculate the probability of the observed multi-locus result (zero significant results over seven tests) given the assumption that true expression differences correspond to the observed levels and that these loci are independent. Under these circumstances, power to detect at least one significant result equals 82% without Bonferroni correction for multiple tests, or 40% using a Bonferroni-adjusted significance threshold. In summary, this experiment finds little evidence for moderate to large differences in expression, but subtle, quantitative differences in expression may exist.

**Supplementary Table 6. The 16 *Arabidopsis thaliana* BAC clones and positions (start and end) of their homologues on *Boechera stricta* reference genome.**

| BAC    | Length (bp) | Chromo-<br>some | Scaffold      | Position on scaffold |          | Physical position* |          | Genetic position* |          |
|--------|-------------|-----------------|---------------|----------------------|----------|--------------------|----------|-------------------|----------|
|        |             |                 |               | Start (bp)           | End (bp) | Start (bp)         | End (bp) | Start (cM)        | End (cM) |
| F2I6   | 108061      | 1               | Scaffold12302 | 308493               | 945202   | 945202             | 12620048 | 16.215            | 16.657   |
| F13N6  | 90698       | 1               | Scaffold8169  | 269954               | 611199   | 15450805           | 15792050 | 17.611            | 17.927   |
| F12K21 | 117585      | 2               | Scaffold1040  | 155707               | 332639   | 11542806           | 11719738 | 48.203            | 48.203   |
| T23K8  | 53090       | 2               | Scaffold26959 | 3955495              | 4566017  | 14878627           | 15489149 | 48.836            | 48.519   |
| T25N22 | 80891       | 3               | Scaffold24399 | 292205               | 310014   | 16506702           | 16524511 | 102.54            | 102.54   |
| MGO3   | 43570       | 3               | Scaffold26833 | 1148763              | 4517264  | 23843108           | 27211609 | 135.649           | 163.285  |
| T19L18 | 87080       | 4               | Scaffold26326 | 531811               | 810775   | 5237879            | 5516843  | 25.19             | 26.204   |
| F7F1   | 89779       | 4               | Scaffold24513 | 504718               | 881714   | 11991703           | 12368699 | 50.769            | 53.988   |
| MGC1   | 2595        | 5               | Scaffold14419 | 314149               | 316758   | 115224             | 117833   | 0.57              | 0.57     |
| MBD2   | 79976       | 5               | Scaffold3148  | 1370932              | 1780895  | 4914471            | 5324434  | 63.775            | 65.554   |
| T10F5  | 102585      | 5               | Scaffold13083 | 340643               | 432698   | 8388774            | 8480829  | 67.14             | 67.14    |
| T4C9   | 85356       | 6               | Scaffold25463 | 548445               | 790858   | 3981483            | 4223896  | 17.171            | 17.171   |
| T3H13  | 118737      | 6               | Scaffold9686  | 59367                | 119129   | 7469571            | 7529333  | 27.554            | 27.554   |
| T8M17  | 114695      | 6               | Scaffold29827 | 211566               | 226057   | 10379396           | 10393887 | 29.275            | 29.275   |
| F5H8   | 70098       | 7               | Scaffold9638  | 29598                | 95279    | 6319745            | 6385426  | 21.732            | 21.732   |
| T1P17  | 137519      | 7               | Scaffold2021  | 8370                 | 19324    | 8304581            | 8315535  | 24.586            | 24.586   |

\*Position on linkage map

**Supplementary Table 7. List of phenotyped traits for the collinear East-std x West-std (Parker x Ruby) QTL mapping experiment**

| <b>Trait Name</b>               | <b>Trait details</b>                                                     |
|---------------------------------|--------------------------------------------------------------------------|
| GH_In_RosNum                    | Rosette number                                                           |
| GH_In_RosW                      | Rosette width                                                            |
| GH_In_RosH                      | Rosette height                                                           |
| GH_In_RosVol                    | Rosette volume                                                           |
| GH_In_Fresh_Weight              | Rosette fresh weight                                                     |
| GH_In_Dry_Weight                | Rosette dry weight                                                       |
| GH_In_Water_Weight              | Rosette water weight = fresh - dry weight                                |
| GH_In_Water_Proportion          | Rosette water weight / fresh weight                                      |
| GH_In_Leaf_Area                 | Rosette leaf area by scanner                                             |
| GH_In_Leaf_Packing              | Rosette leaf area / Rosette volume                                       |
| GH_In_Fresh_weight.Area         | Rosette fresh weight / leaf area                                         |
| GH_In_Dry_weight.Area           | Rosette dry weight / leaf area                                           |
| GH_In_Water_weight.Area         | Rosette water weight / leaf area                                         |
| GH_In_Water_proportion.Area     | Rosette water proportion / leaf area                                     |
| GH_In_Leaf_mean_L               | Length of largest leaf                                                   |
| GH_In_Leaf_mean_W               | Width of largest leaf                                                    |
| GH_In_Leaf_mean_W.L             | Leaf width / length                                                      |
| GH_In_Flower_Julian_day         | Flowering time in Julian day                                             |
| GH_In_Flower_W                  | Width when flowering                                                     |
| GH_In_Flower_H                  | Height when flowering                                                    |
| GH_In_Flower_LN                 | Leaf number when flowering                                               |
| GH_In_Flower_Ros                | Rosette number when flowering                                            |
| GH_In_Flower_Stalk              | Stalk number when flowering                                              |
| GH_In_fin_W                     | Final width number when experiment ends                                  |
| GH_In_fin_H                     | Final height                                                             |
| GH_In_fin_stalk.width           | Final main stalk width                                                   |
| GH_In_fin_FLN                   | Final remaining flower number                                            |
| GH_In_fin_FRN                   | Final fruit number                                                       |
| GH_In_fin_longest.silique       | Longest silique length                                                   |
| GH_In_fin_FRNxlongest.silique   | Fruie number multiplied by longest silique length                        |
| GH_In_fin_branch_on_mainstalk   | Number of reproductive branches on main stalk                            |
| GH_In_fin_length_with_branch    | Stalk height in the region with reproductive branches                    |
| GH_In_fin_branch_internode      | Internode of the reproductive part of main branch                        |
| GH_fin_tip_bud_active           | Whether the top youngest flowering bud is still green at the end of expt |
| GH_fin_have_mature_fruit        | Whether it has a dried-up and matured fruit in the end of experiment     |
| GH_fin_central_tip_stop_develop | Whether the top meristem stops develop at the end of experiment          |



**Supplementary Table 8. Flowering time genes in inversion region of Chromosome 1 of *Boechera stricta*.** The three genes located in QTL regions (peak +/- 100k bp) are in bold.

| Gene_name               | Scaffold             | Start          | End           | Arabidopsis       |          | Putative_function                                             |
|-------------------------|----------------------|----------------|---------------|-------------------|----------|---------------------------------------------------------------|
|                         |                      |                |               | orthology         | thaliana |                                                               |
| <b>Bostr.26675s0108</b> | <b>Scaffold26675</b> | <b>659,047</b> | <b>661967</b> | <b>ATI1G50700</b> |          | <b>calcium-dependent protein kinase 33</b>                    |
| Bostr.26675s0088        | Scaffold26675        | 545,606        | 547858        | ATI1G50960        |          | gibberellin 2-oxidase 7                                       |
| Bostr.26675s0074        | Scaffold26675        | 481,495        | 483840        | ATI1G51140        |          | basic helix-loop-helix (bHLH) DNA-binding superfamily protein |
| Bostr.26675s0051        | Scaffold26675        | 334,778        | 337078        | ATI1G51450        |          | TRAUCCO                                                       |
| Bostr.0124s0064         | Scaffold124          | 350,941        | 352379        | ATI1G52740        |          | histone H2A protein 9                                         |
| Bostr.0124s0099         | Scaffold124          | 558,489        | 562796        | ATI1G53090        |          | SPA1-related 4                                                |
| Bostr.0124s0106         | Scaffold124          | 599,305        | 600288        | ATI1G53160        |          | squamosa promoter binding protein-like 4                      |
| Bostr.13671s0011        | Scaffold13671        | 56,078         | 57768         | ATI1G14400        |          | ubiquitin carrier protein 1                                   |
| <b>Bostr.13671s0159</b> | <b>Scaffold13671</b> | <b>884,222</b> | <b>885478</b> | <b>ATI1G12910</b> |          | <b>Transducin/WVD40 repeat-like superfamily protein</b>       |
| Bostr.13671s0424        | Scaffold13671        | 2,264,288      | 2268324       | ATI1G10570        |          | Cysteine proteinases superfamily protein                      |
| Bostr.13671s0476        | Scaffold13671        | 2,522,138      | 2525008       | ATI1G10120        |          | basic helix-loop-helix (bHLH) DNA-binding superfamily protein |
| Bostr.25494s0015        | Scaffold25494        | 68,807         | 74496         | ATI1G09570        |          | phytochrome A                                                 |
| <b>Bostr.25219s0051</b> | <b>Scaffold25219</b> | <b>224,347</b> | <b>226129</b> | <b>ATI1G08970</b> |          | <b>nuclear factor Y, subunit C9</b>                           |
| Bostr.25219s0119        | Scaffold25219        | 559,042        | 575787        | ATI1G08260        |          | DNA polymerase epsilon catalytic subunit                      |
| Bostr.25219s0356        | Scaffold25219        | 1,618,878      | 1620440       | ATI1G06040        |          | B-box zinc finger family protein                              |
| Bostr.25219s0382        | Scaffold25219        | 1,730,774      | 1738687       | ATI1G05830        |          | trithorax-like protein 2                                      |
| Bostr.25219s0486        | Scaffold25219        | 2,228,447      | 2230930       | ATI1G04870        |          | protein arginine methyltransferase 10                         |
